# Supplementary material for: Activating black phosphorene's inert basal plane via nonprecious metal–nonmetal co-doping for visible-light-driven photocatalytic H2 evolution
Source: Royal Society of Chemistry journal article supplement (doi:10.1039/d3nj04778d), 2023-11-24
Supplement: d3nj04778d1.pdf [file d3nj04778d1.pdf]

**Electronic Supplementary Material (ESI)·for**

**Activating black phosphorene's inert basal  
plane via nonprecious metal-nonmetal co-  
doping for visible-light-driven photocatalytic H<sub>2</sub>  
evolution**

Luteng Luo, Weiting Cui, Hang Xue, Sunzai Ke, Xuhui Yang\*, Min-Quan Yang and  
Qingrong Qian\*

College of Environmental and Resource Sciences, College of Carbon Neutral Modern Industry,  
Fujian Key Laboratory of Pollution Control & Resource Reuse, Fujian Normal University,  
Fuzhou 350117, P.R. China

*\*To whom correspondence should be addressed*

E-mail: xhyang@fjnu.edu.cn, qrqian@fjnu.edu.cn

Supporting information

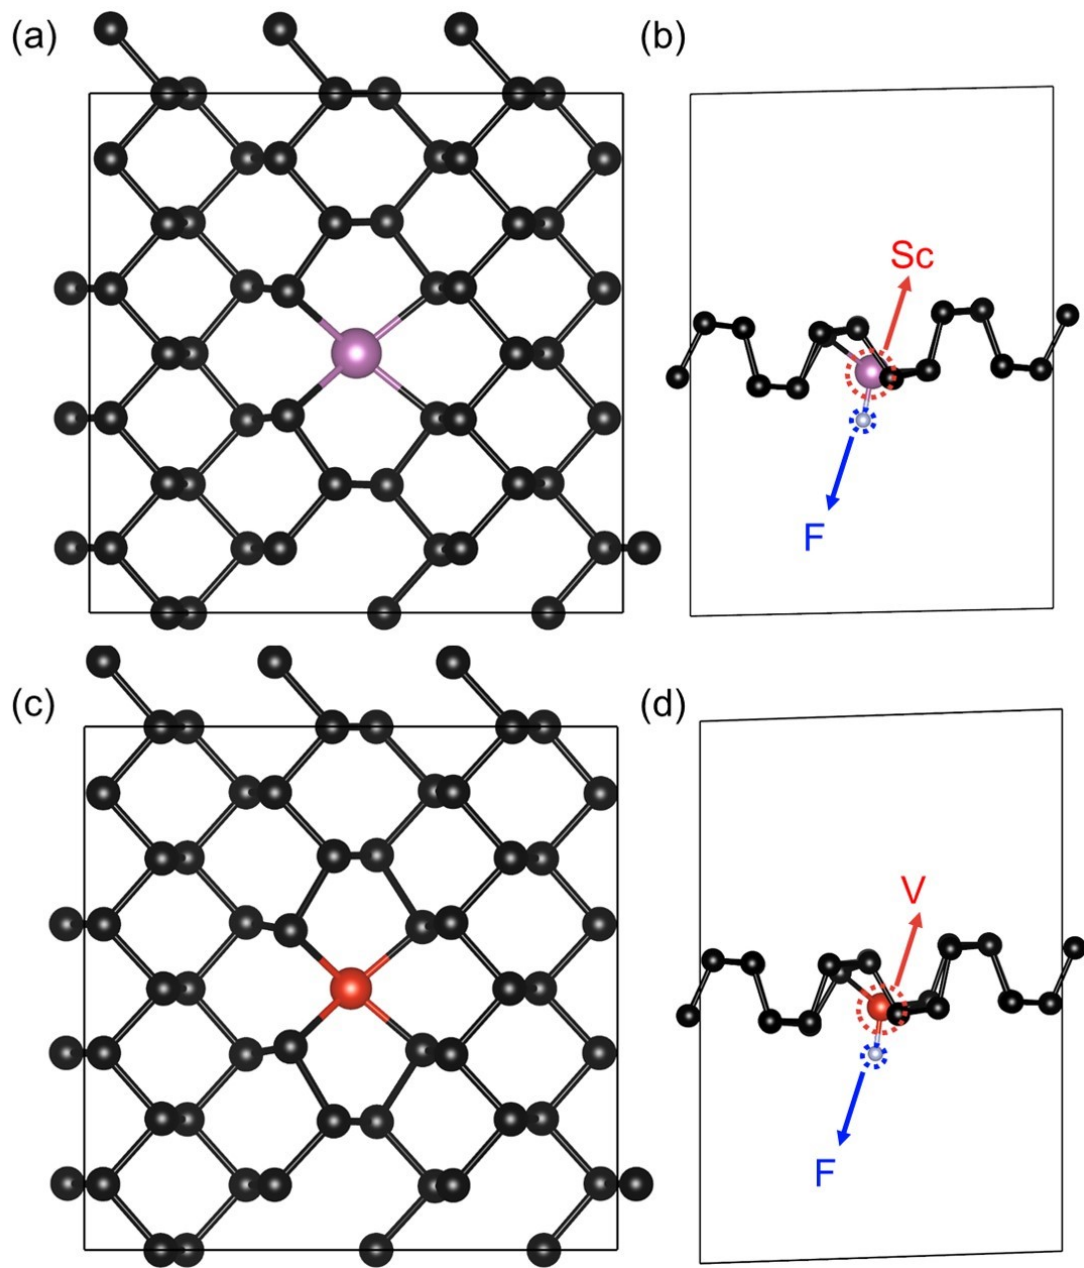

Fig S1. (a), (c) the top view of Sc-F and V-F co-doped BPs. (b), (d) the side view of Sc-F and V-F co-doped BPs.

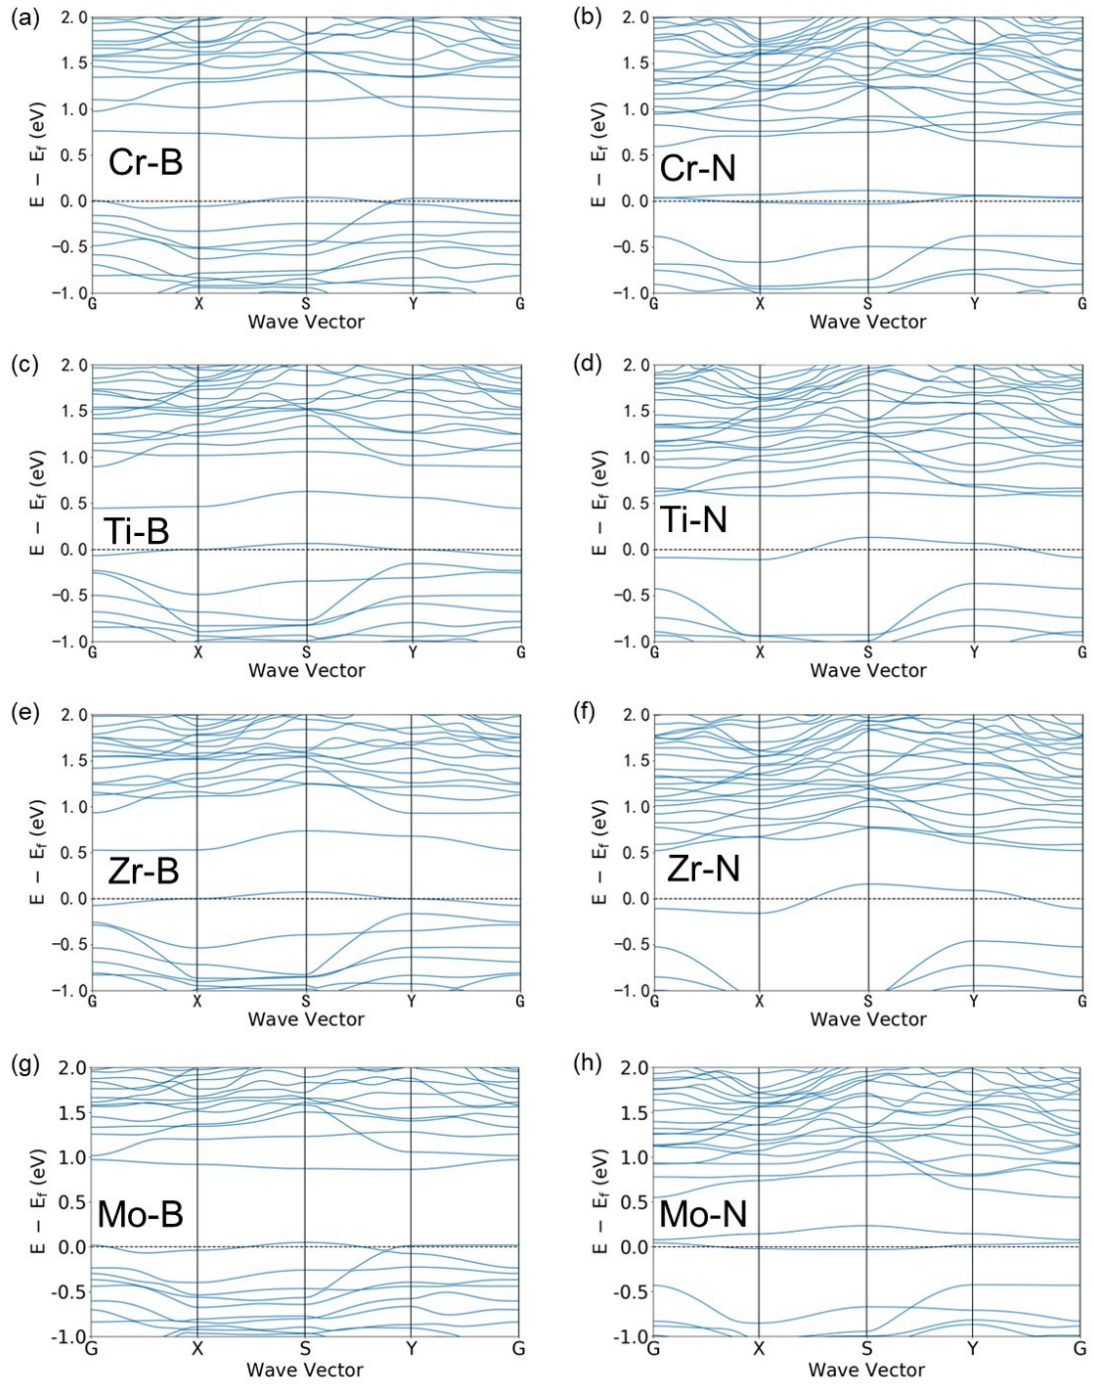

Fig S2. The PBE band structures of co-doped BPs. (a) Cr-B, (b) Cr-N, (c) Ti-B, (d) Ti-N, (e) Zr-B, (f) Zr-N, (g) Mo-B and (h) Mo-N.

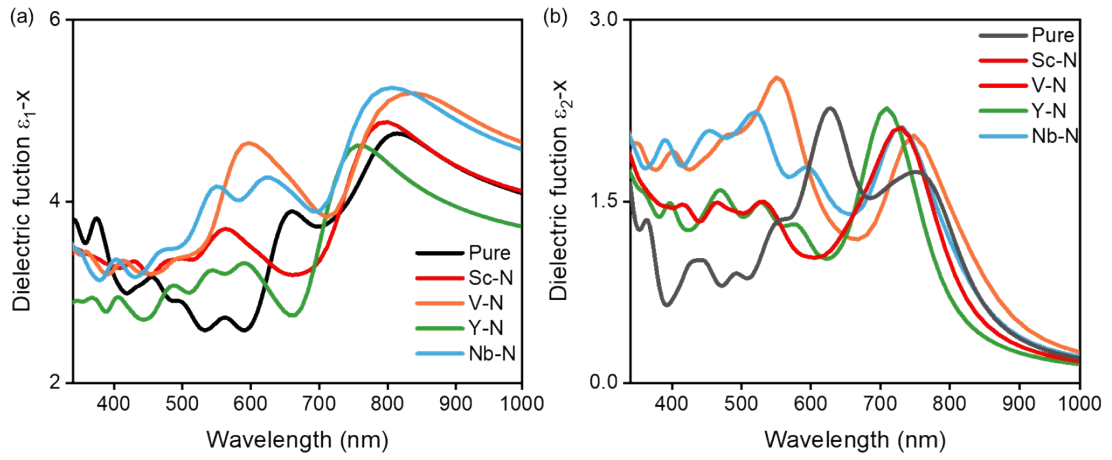

Fig S3. The (a) real and (b) imaginary parts of dielectric functions along the x direction of isoelectric co-doped BPs.

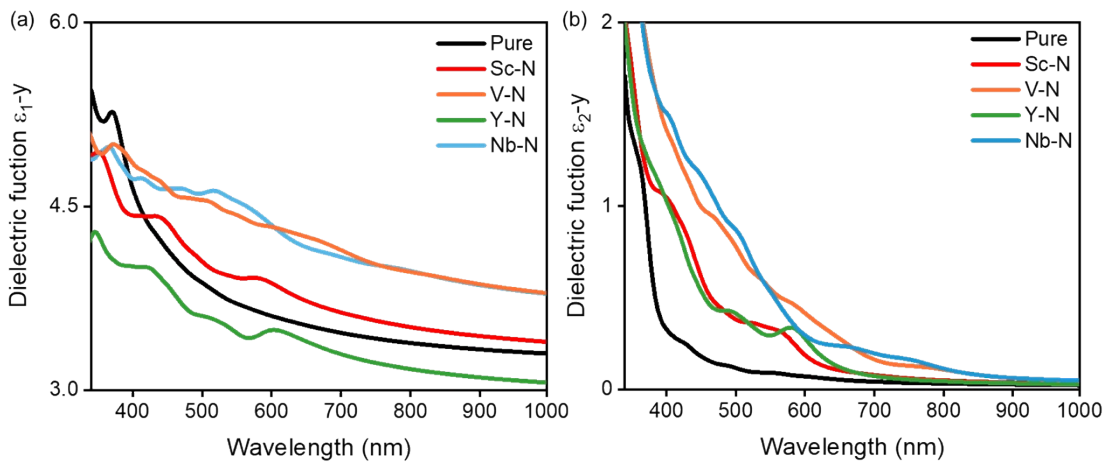

Fig S4. The (a) real and (b) imaginary parts of dielectric functions along the y direction of isoelectric co-doped BPs.
